# Supplementary material for: A new type of DNA phosphorothioation-based antiviral system in archaea
Source: PubMed Central journal article supplement (PMC6459918; doi:10.1038/s41467-019-09390-9), 2019-04-11
Supplement: 41467_2019_9390_MOESM1_ESM.pdf [file 41467_2019_9390_MOESM1_ESM.pdf]

Supplementary Information

**A new type of DNA phosphorothioation-based antiviral  
system in archaea**

Xiong et al.

**Supplementary Table 1.** Analysis of consensus sequences in four archaeal strains

| <i>H. jeotgali</i> A29       | GATC | Downstream base     |                     |                     |                    |
|------------------------------|------|---------------------|---------------------|---------------------|--------------------|
|                              |      | A                   | C                   | G                   | T                  |
| Upstream base                | A    | 11.1%<br>(119/1072) | 11.0%<br>(159/1445) | 2.7%<br>(106/3890)  | 5.5%<br>(37/670)   |
|                              | C    | 5.0%<br>(188/3754)  | 13.4%<br>(710/5290) | 3.2%<br>(343/10834) | 3.3%<br>(124/3769) |
|                              | G    | 3.4%<br>(45/1323)   | 5.0%<br>(78/1556)   | 1.2%<br>(63/5087)   | 1.2%<br>(17/1395)  |
|                              | T    | 10.5%<br>(91/870)   | 17.8%<br>(230/1289) | 2.6%<br>(97/3798)   | 3.9%<br>(44/1116)  |
| <i>H. limi</i> JCM 16811     | GATC | Downstream base     |                     |                     |                    |
|                              |      | A                   | C                   | G                   | T                  |
| Upstream base                | A    | 9.8%<br>(58/593)    | 9.9%<br>(94/953)    | 2.7%<br>(50/1856)   | 9.4%<br>(38/405)   |
|                              | C    | 5.6%<br>(102/1820)  | 10.8%<br>(310/2866) | 3.8%<br>(175/4563)  | 4.7%<br>(86/1830)  |
|                              | G    | 2.1%<br>(16/763)    | 4.2%<br>(51/1205)   | 0.6%<br>(17/2960)   | 2.0%<br>(18/892)   |
|                              | T    | 19.1%<br>(81/424)   | 22.8%<br>(172/756)  | 6.0%<br>(111/1836)  | 10.5%<br>(63/601)  |
| <i>H. salinum</i> JCM 19729  | GATC | Downstream base     |                     |                     |                    |
|                              |      | A                   | C                   | G                   | T                  |
| Upstream base                | A    | 1.9%<br>(17/905)    | 3.2%<br>(1.9/1220)  | 0.7%<br>(18/2725)   | 0.9%<br>(5/579)    |
|                              | C    | 1.9%<br>(53/2795)   | 7.4%<br>(273/3678)  | 1.7%<br>(96/5762)   | 0.9%<br>(27/2745)  |
|                              | G    | 1.2%<br>(12/1009)   | 4.9%<br>(43/881)    | 0.6%<br>(22/3781)   | 0.5%<br>(6/1135)   |
|                              | T    | 8.3%<br>(55/660)    | 13.9%<br>(136/977)  | 2.6%<br>(71/2739)   | 4.6%<br>(38/830)   |
| <i>N. bangense</i> JCM 10635 | GATC | Downstream base     |                     |                     |                    |
|                              |      | A                   | C                   | G                   | T                  |
| Upstream base                | A    | 3.7%<br>(43/1168)   | 6.5%<br>(81/1241)   | 1.4%<br>(46/3181)   | 2.1%<br>(14/656)   |
|                              | C    | 4.0%<br>(142/3513)  | 12.9%<br>(479/3686) | 3.5%<br>(270/7691)  | 2.5%<br>(79/3123)  |
|                              | G    | 1.6%<br>(20/1215)   | 4.8%<br>(42/880)    | 0.9%<br>(31/3567)   | 0.6%<br>(7/1242)   |
|                              | T    | 7.2%<br>(73/1013)   | 13.4%<br>(149/1111) | 3.1%<br>(107/3467)  | 2.6%<br>(31/1188)  |

Data represent the SMRT sequencing-determined frequency of sequences containing the noted bases flanking the 5'-G<sub>PS</sub>ATC-3' consensus sequences in four halophilic archaea. Preferential and rare occurrences of PT modifications were present in the 5'-tGATCc-3' (red) and 5'-gGATC(g/t)-3' (blue) motifs, respectively.

**Supplementary Table 2.** Analysis of methylation motifs in four archaeal strains by SMRT sequencing

*H. jeotgali* A29

| Motif           | Modified Position | Modification Type | Motifs Detected | # Of Motifs Detected | # Of Motifs In Genome | Mean Modification QV1 | Mean Motif Coverage | Partner Motif |
|-----------------|-------------------|-------------------|-----------------|----------------------|-----------------------|-----------------------|---------------------|---------------|
| CATTC           | 2                 | m <sup>6</sup> A  | 98.04%          | 2,554                | 2,605                 | 127.04                | 93.66               | -             |
| CACCAYG         | 5                 | m <sup>6</sup> A  | 97.96%          | 817                  | 834                   | 121.82                | 97.64               | -             |
| GAGGAG          | 5                 | m <sup>6</sup> A  | 95.87%          | 5,903                | 6,157                 | 113.53                | 96.81               | -             |
| CTGACGNNBN NGT  | 5                 | m <sup>4</sup> C  | 67.56%          | 152                  | 225                   | 63.61                 | 97.23               | -             |
| CTAGBNNGT       | 1                 | m <sup>4</sup> C  | 40.72%          | 68                   | 167                   | 56.32                 | 95.22               | -             |
| GCAATNNBNN NNNV | 4                 | m <sup>6</sup> A  | 22.75%          | 276                  | 1,213                 | 50.59                 | 104.80              | -             |
| GGTRTVGCR       | 3                 | unknown           | 21.08%          | 78                   | 370                   | 40.10                 | 111.03              | -             |
| TCCYAVYW        | 1                 | unknown           | 16.39%          | 150                  | 915                   | 42.29                 | 117.23              | -             |
| GNNNNNNGTH      | 1                 | unknown           | 4.45%           | 5,674                | 127,511               | 37.94                 | 112.01              | -             |
| THR             | 1                 | unknown           | 1.10%           | 6,662                | 604,625               | 35.34                 | 139.63              | -             |

*N. bangense* JCM 10635

| Motif     | Modified Position | Modification Type | Motifs Detected | # Of Motifs Detected | # Of Motifs In Genome | Mean Modification QV | Mean Motif Coverage | Partner Motif |
|-----------|-------------------|-------------------|-----------------|----------------------|-----------------------|----------------------|---------------------|---------------|
| CAGATG    | 4                 | m <sup>6</sup> A  | 99.51%          | 1,832                | 1,841                 | 152.16               | 105.28              | -             |
| CATTC     | 2                 | m <sup>6</sup> A  | 98.74%          | 4,085                | 4,137                 | 151.99               | 102.10              | -             |
| CTAGTTCG  | 1                 | m <sup>4</sup> C  | 81.48%          | 22                   | 27                    | 82.91                | 95.32               | -             |
| AGGCMGYA  | 1                 | m <sup>6</sup> A  | 36.87%          | 153                  | 415                   | 68.86                | 109.76              | -             |
| ANNNACTAG | 1                 | m <sup>6</sup> A  | 31.40%          | 65                   | 207                   | 69.91                | 100.38              | -             |
| TTRBAVBW  | 1                 | unknown           | 16.06%          | 592                  | 3,687                 | 46.97                | 107.93              | -             |
| TVNNNNNH  | 1                 | unknown           | 3.57%           | 34,805               | 973,601               | 36.79                | 114.01              | -             |

*H. salinum* JCM 19729

| Motif     | Modified Position | Modification Type | Motifs Detected | # Of Motifs Detected | # Of Motifs In Genome | Mean Modification QV | Mean Motif Coverage | Partner Motif |
|-----------|-------------------|-------------------|-----------------|----------------------|-----------------------|----------------------|---------------------|---------------|
| GAGATC    | 4                 | m <sup>6</sup> A  | 81.69%          | 5,096                | 6,238                 | 69.36                | 46.61               | -             |
| GCATC     | 3                 | m <sup>6</sup> A  | 73.85%          | 5,271                | 7,137                 | 74.21                | 46.80               | -             |
| CTTGAT    | 5                 | m <sup>6</sup> A  | 73.18%          | 745                  | 1,018                 | 77.56                | 47.58               | -             |
| CTAGYNNG  | 1                 | m <sup>4</sup> C  | 52.43%          | 335                  | 639                   | 52.49                | 45.52               | -             |
| CGATCC    | 3                 | m <sup>6</sup> A  | 14.20%          | 1,246                | 8,777                 | 60.14                | 34.05               | -             |
| HGWNVNVDG | 2                 | unknown           | 4.55%           | 4,973                | 109,331               | 36.59                | 49.78               | -             |

*H. limi* JCM 16811

| Motif     | Modified Position | Modification Type | Motifs Detected | # Of Motifs Detected | # Of Motifs In Genome | Mean Modification QV | Mean Motif Coverage | Partner Motif |
|-----------|-------------------|-------------------|-----------------|----------------------|-----------------------|----------------------|---------------------|---------------|
| CGATCC    | 3                 | m <sup>6</sup> A  | 99.76%          | 7,133                | 7,150                 | 149.53               | 93.40               | -             |
| TTCGAA    | 6                 | m <sup>6</sup> A  | 88.88%          | 1,303                | 1,466                 | 109.61               | 86.55               | TTCGAA        |
| RAGGYASYT | 2                 | m <sup>6</sup> A  | 43.92%          | 83                   | 189                   | 59.02                | 93.49               | -             |
| DAGGYVGYA | 2                 | m <sup>6</sup> A  | 20.14%          | 149                  | 740                   | 64.07                | 92.99               | -             |
| TNNNNNH   | 1                 | unknown           | 2.10%           | 18,282               | 869,418               | 36.65                | 98.39               | -             |
| TVRVNNG   | 1                 | unknown           | 1.72%           | 2,692                | 156,155               | 35.81                | 98.57               | -             |

1 QV = quality value

**Supplementary Table 3.** Strains and plasmids used in this study.

| Strains                      | Characteristics                                                                                          | Reference or Source |
|------------------------------|----------------------------------------------------------------------------------------------------------|---------------------|
| <i>E. coli</i> DH5 $\alpha$  | <i>E. coli</i> host for pFJ6H and its derivatives                                                        | Sangon Biotech      |
| <i>Natrinema</i> sp. J7-1    | With SNJ1 proviral genome pHH205, cannot be infected by SNJ1                                             | 1                   |
| <i>Natrinema</i> sp. CJ7-F   | $\Delta$ <i>pyrF</i> , pHH205-free derivative of J7-1, can be infected by SNJ1                           | 2                   |
| <i>H. salinum</i> JCM 19729  | d(G <sub>PS</sub> A)                                                                                     | 3                   |
| <i>H. limi</i> JCM 16811     | d(G <sub>PS</sub> A), d(G <sub>PS</sub> G)                                                               | 4                   |
| <i>H. jeotgali</i> A29       | d(G <sub>PS</sub> A)                                                                                     | 5                   |
| <i>N. bangense</i> JCM 10635 | d(G <sub>PS</sub> A)                                                                                     | 6                   |
| Plasmids                     | Characteristics                                                                                          | Reference or Source |
| pYCJ-HH                      | A shuttle expression plasmid constructed based on the stable replicon of SNJ1                            | 7                   |
| pFJ6-H                       | A shuttle plasmid that can replicates in both <i>Natrinema</i> sp. CJ7-F and <i>E. coli</i> DH5 $\alpha$ | 2                   |
| pWHU3253                     | pYCJ-HH derivative harbouring <i>dndCDEA</i> from <i>H. jeotgali</i> A29                                 | This work           |
| pWHU3803                     | pFJ6-H derivative for expression of <i>dndCDEA</i>                                                       | This work           |
| pWHU3804                     | pFJ6-H derivative for expression of <i>pbeABCD</i>                                                       | This work           |
| pWHU3789                     | pFJ6-H derivative for expression of <i>dndCDEA</i> <sub>C344S</sub> - <i>pbeABCD</i>                     | This work           |
| pWHU3808                     | pFJ6-H derivative for expression of <i>dndCDEA-pbeABCD</i>                                               | This work           |
| pWHU3809                     | pFJ6-H derivative for expression of $\Delta$ <i>dndC-dndDEA-pbeABCD</i>                                  | This work           |
| pWHU3810                     | pFJ6-H derivative for expression of $\Delta$ <i>dndD-dndCEA-pbeABCD</i>                                  | This work           |
| pWHU3811                     | pFJ6-H derivative for expression of $\Delta$ <i>dndE-dndCDA-pbeABCD</i>                                  | This work           |
| pWHU3812                     | pFJ6-H derivative for expression of $\Delta$ <i>dndA-dndCDE-pbeABCD</i>                                  | This work           |
| pWHU3813                     | pFJ6-H derivative for expression of <i>dndCDEA-<math>\Delta</math>pbeA-pbeBCD</i>                        | This work           |
| pWHU3814                     | pFJ6-H derivative for expression of <i>dndCDEA-<math>\Delta</math>pbeB-pbeACD</i>                        | This work           |
| pWHU3815                     | pFJ6-H derivative for expression of <i>dndCDEA-<math>\Delta</math>pbeC-pbeABD</i>                        | This work           |
| pWHU3816                     | pFJ6-H derivative for expression of <i>dndCDEA-<math>\Delta</math>pbeD-pbeABC</i>                        | This work           |

**Supplementary Table 4. Primers used in this study**

| Primers                        | Sequence (5'-3')                                             | Reference or Source |
|--------------------------------|--------------------------------------------------------------|---------------------|
| <b>Heterologous expression</b> |                                                              |                     |
| dndCDEA-pYC-F                  | TACGTAACGGTTTCACAATCT                                        | This study          |
| dndCDEA-pYC-R                  | AAGCTTAAGTCGCTGAGTCTAG                                       | This study          |
| dndCDEA-pFJ-F                  | TATTTGCGGGCAAGGGCGGCCGCACGGTTTCACAATCT                       | This study          |
| dndCDEA-pFJ-R                  | GATTACGCCAAGCTTGCATGCAAGTCGCTGAGTCTAG                        | This study          |
| pbeABCD-F                      | TATTTGCGGGCAAGGGCGGCCGCATGCCTGAGGACAAGCCGAATC                | This study          |
| pbeABCD-R                      | GATTACGCCAAGCTTGCATGCGAGTTGCTGTCGTAGCGAAACG                  | This study          |
| Hpro-dndCDEA-F                 | AGAGCAGATTGTAAGTACTGAGAGTGCACCATATGCGCGTCGACCGCCCTCGAGGCGAGC | This study          |
| Hpro-dndCDEA-R                 | AAGAATAAGCCGAGATGGATCCCCGGGTACCCAGCTATGACCATGATTACGCCTCA     | This study          |
| <b>In-frame gene deletion</b>  |                                                              |                     |
| ΔdndC-3F                       | GTTGAGCTTCATTTCTCGATCCACTCCCTATAAGATTGTG                     | This study          |
| ΔdndC-2R                       | CACAATCTTATAGGGAGTGGATCGAGAAATGAAGCTCAAC                     | This study          |
| ΔdndD-3F                       | GGTTGAGGTCTTTACTCATTCTCGATTACTCCATCAT                        | This study          |
| ΔdndD-2R                       | ATGATGGAGTAAATCGAGAAAATGAGTAAAGACCTCAACC                     | This study          |
| ΔdndE-2F                       | GAGTCTGTGGTCATGATTCTAGGTCTTTACTCATTGTTGA                     | This study          |
| ΔdndE-2R                       | TCAACAATGAGTAAAGACCTAGAATCATGACCACAGACTC                     | This study          |
| ΔdndA-F                        | AGAGCAGATTGTAAGTACTGAGAGTGCACCATATGCGCGTCGACCGCCCTCGAGGCGAGC | This study          |
| ΔdndA-R                        | TAAGCCGAGATGGATCCCCGGGTACCGACTTCCCGATCAGAGTCTG               | This study          |
| ΔpbeA-F                        | AAGACGGTATTTGCGGGCAAGGGCGGCCGCTGTGTAAGAAGCAGAGCAG            | This study          |
| ΔpbeA-R                        | CGACGGGCTCGCCTCGAGGGCGGTGCATATGGTGCCTCTCAGTACAATCT           | This study          |
| ΔpbeB-UF                       | ATGAATCAGAGCTATTAGCGGTACTTAATGAGGATTACACGAATTTCACT           | This study          |
| ΔpbeB-UR                       | CGGTATTTGCGGGCAAGGGCGGCCGCATGCCTGAGGACAAGCCGAATCCA           | This study          |
| ΔpbeB-DF                       | ACGGGCTCGCCTCGAGGGCGGTGCATATGGTGCCTCTCAGTACAATCTGC           | This study          |
| ΔpbeB-DR                       | TTATATCGGAGGGTGGTCAAGAGCATGCCAAGCTTGGCGTAATCATG              | This study          |
| ΔpbeC-UF                       | TATTTGCGGGCAAGGGCGGCCGCATGCCTGAGGACAAG                       | This study          |
| ΔpbeC-UR                       | ACGACACAGGAAAGACATAATGGCTCGAACGCTCA                          | This study          |
| ΔpbeC-DF                       | TGAGCGTTGAGCCATTATGTCTTTCTGTGTCGT                            | This study          |
| ΔpbeC-DR                       | CGCCTCGAGGGCGGTGCATATGGTGCCTCTCAGTAC                         | This study          |
| ΔpbeD-UF                       | TATTTGCGGGCAAGGGCGGCCGCATGCCTGAGGACAAG                       | This study          |
| ΔpbeD-UR                       | ATGCTTACGTTGAGCCATTAGTCATCA                                  | This study          |
| ΔpbeD-DF                       | GAACGTAAGCATGCCAAGCTTG                                       | This study          |
| ΔpbeD-DR                       | CGCCTCGAGGGCGGTGCATATGGTGCCTCTCAGTAC                         | This study          |
| <b>Point mutation</b>          |                                                              |                     |
| dndAc <sub>344S</sub> -UF      | GTAAGTACTGAGAGTGCACCATATGACCGCCCTCGAGGCG                     | This study          |
| dndAc <sub>344S</sub> -UR      | CACTCGCACTAGCCGAC                                            | This study          |
| dndAc <sub>344S</sub> -DF      | GTCGGCTAGTGGAGTG                                             | This study          |
| dndAc <sub>344S</sub> -DR      | CGAGATGGATCCCCGGGTACCCAGCTATGACCATGA                         | This study          |
| <b>Real-time qPCR assay</b>    |                                                              |                     |
| radA-F                         | CGTCAACGTCCAGCTTCCACAG                                       | 2                   |
| radA-R                         | GAGCCTTCGATTTGCGGGTCC                                        | 2                   |
| SNJ1-F                         | GCGGAAATACCCGAACACCAAG                                       | 2                   |
| SNJ1-R                         | CTCGCCACAGCAGTCGCAGAT                                        | 2                   |
| <b>Southern blot assay</b>     |                                                              |                     |
| SNJ1-southern-F                | AAGATGAGATCCGAGGGAAGTGGCT                                    | This study          |
| SNJ1-southern-R                | CGCTGCGTCTCGCTCCAAACT                                        | This study          |
| <b>RT-PCR</b>                  |                                                              |                     |
| Primer A                       | ATGATCTGTTGGTTCTCCCTG                                        | This study          |
| Primer B                       | CTCTATGGCATCTCGGACCT                                         | This study          |
| Primer C                       | GGCTAAGGATCACGGAGAAC                                         | This study          |
| Primer D                       | CGTACTTCAGCACTTCTTCC                                         | This study          |
| pbeC-D-F                       | TATCGCCTGAGTCTATTG                                           | This study          |
| pbeC-D-R                       | TTCATCTACTGCCTTCTG                                           | This study          |

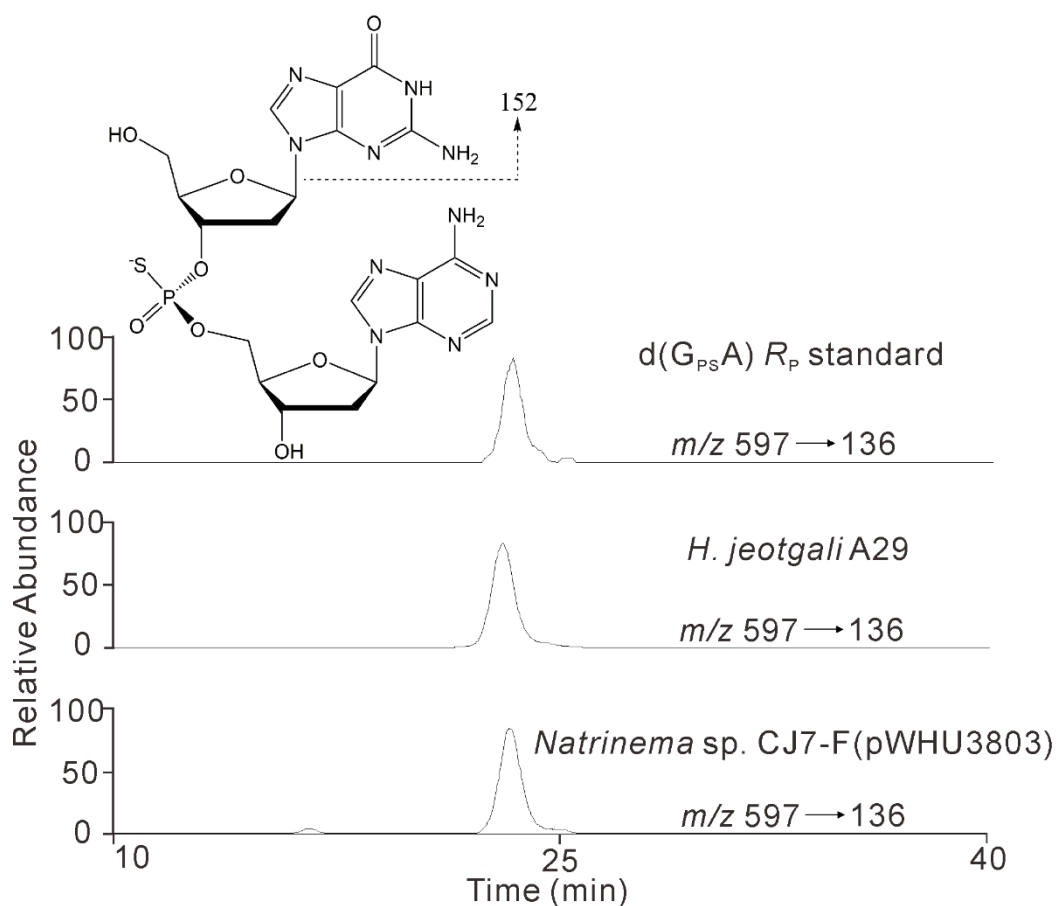

**Supplementary Figure 1.** The PT modifications in archaeal strains detected using liquid chromatography-coupled tandem quadrupole mass spectrometry (LC-MS/MS). Naturally occurring d(G<sub>PS</sub>A), with the protonated molecular ion [M+H] appearing at  $m/z\ 597$ , in *H. jeotgali* A29 exhibited a retention time identical to that of synthetic d(G<sub>PS</sub>A) R<sub>P</sub>. Plasmid pWHU3803, expressing the *dndCDEA* operon from *H. jeotgali* A29, conferred d(G<sub>PS</sub>A) in *Natrinema* sp. CJ7-F. The fragmentation pattern of d(G<sub>PS</sub>A) is shown in the structural inset. Source data are provided as a Source Data file.

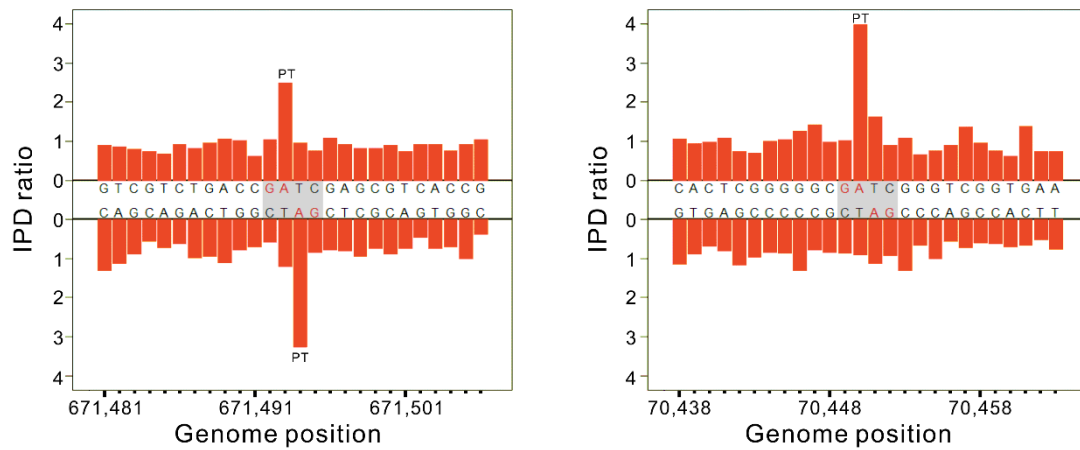

**Supplementary Figure 2.** SMRT sequencing analysis reveals full and hemi-PT modifications in archaeal genomes. Example IPD (interpulse duration) ratio plots showing instances of fully and hemi-PT-modified 5'-G<sub>PS</sub>ATC-3'/5'-G<sub>PS</sub>ATC-3' and 5'-G<sub>PS</sub>ATC-3'/5'-GATC-3', respectively, in *H. jeotgali* A29. Source data are provided as a Source Data file.

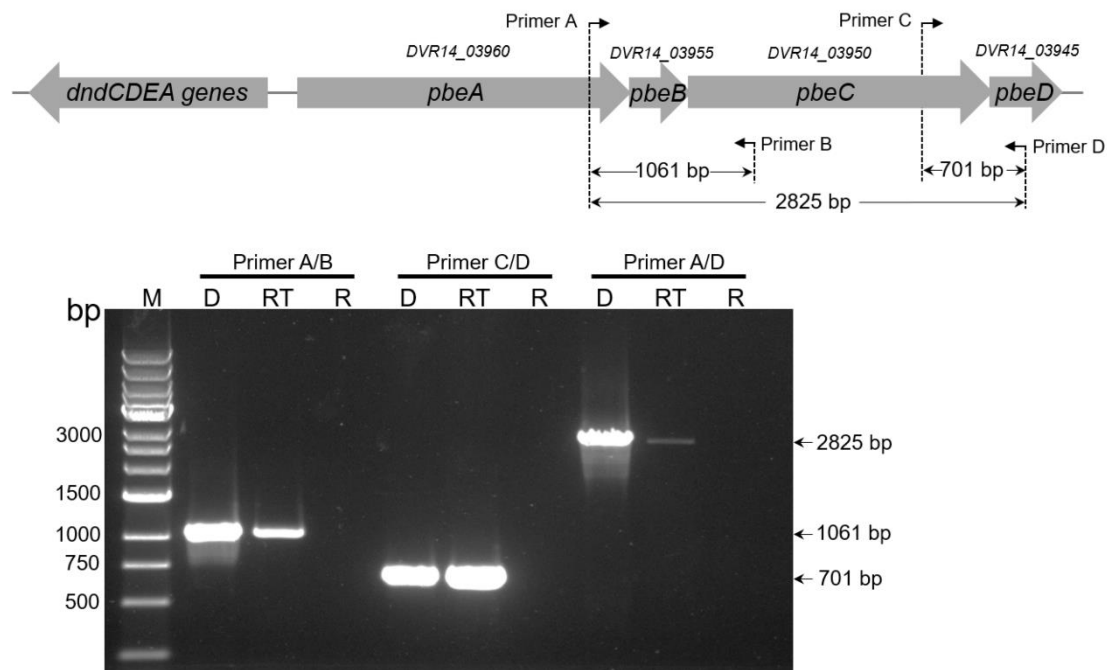

**Supplementary Figure 3.** RT-PCR analysis of the co-transcription of *DVR14\_03960-DVR14\_03955-DVR14\_03950-DVR14\_03945* (*pbeABCD*). The primers are schematically located above or below the genes. The PCR products were obtained using genomic DNA (lanes marked with “D”), reverse-transcribed cDNA (lanes marked with “RT”) and untranscribed RNA (lanes marked with “R”) from *H. jeotgali* A29 as the template. Primers A and B were used to produce the 1,061-bp PCR fragment; primers C and D were used to generate the 701-bp PCR fragment; and primers A and D were used to produce the 2,825-bp PCR fragment. Source data are provided as a Source Data file.



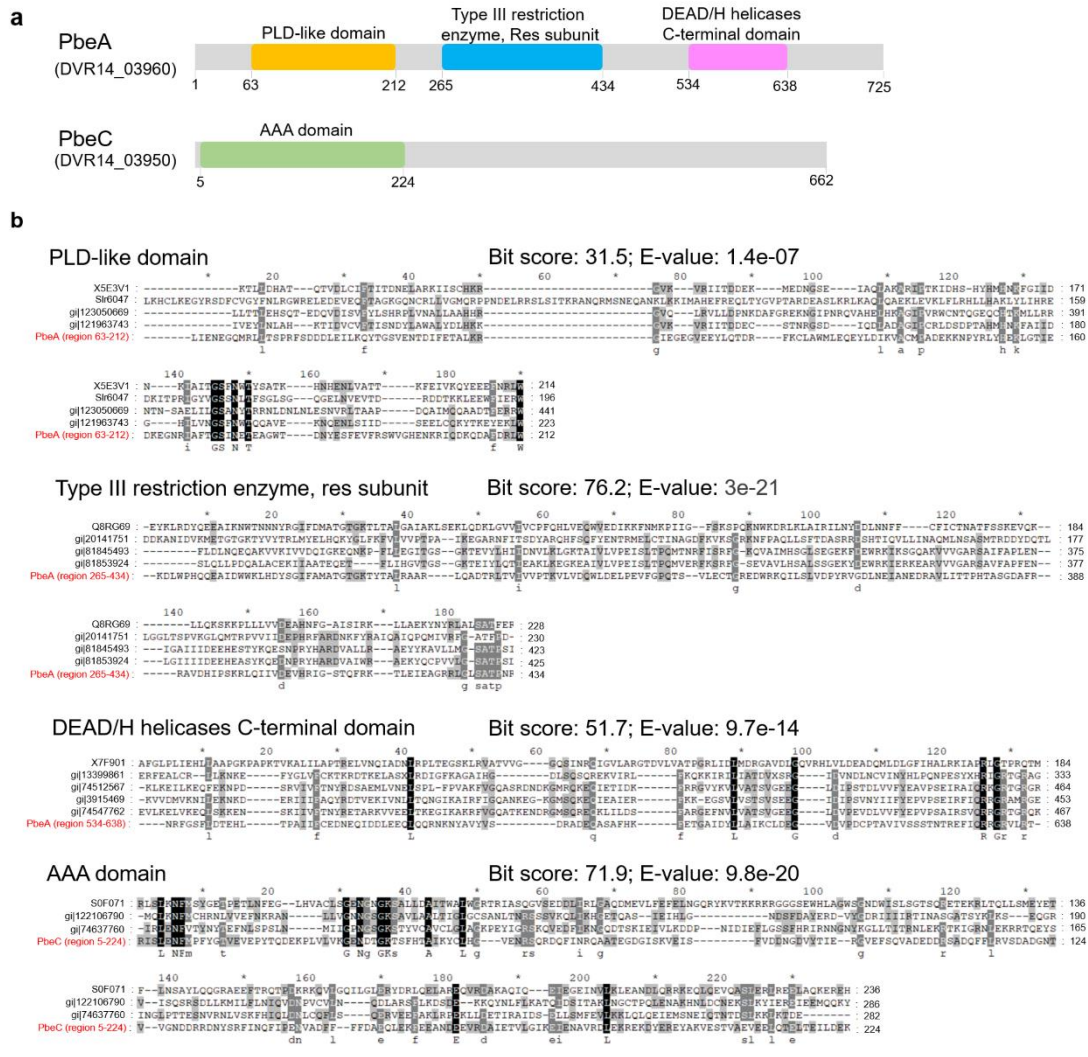

**Supplementary Figure 4.** Pbe proteins, their domain annotations and sequence alignments. **a** Domain annotations of Pbe proteins using the Pfam version 32.0 database. The domain annotation scores and e-value are listed in Supplementary Data 5. **b** Sequence alignments of individual domain of PbeA and PbeC with homologous domains. The domain-based multiple sequence alignments of these candidate domains with other similar domain architectures were performed using ClustalW in MEGA software version 7.

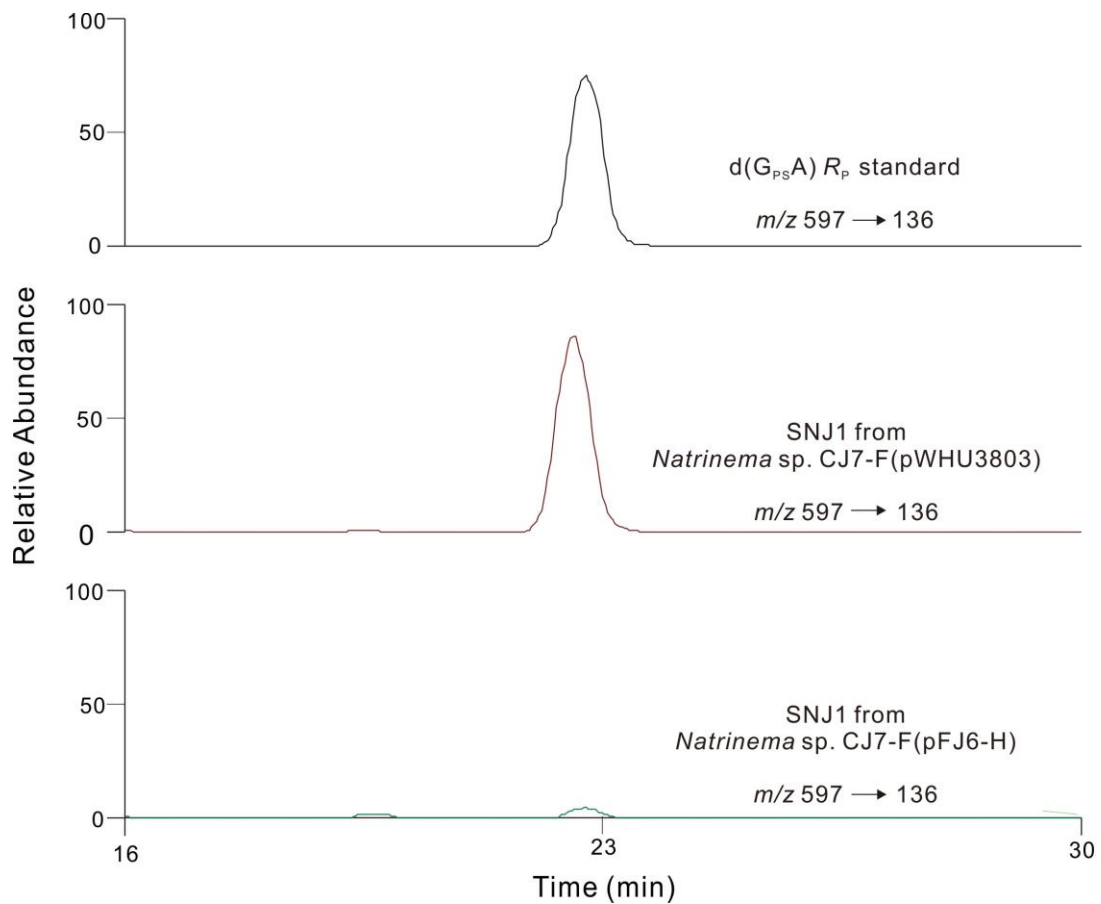

**Supplementary Figure 5.** LC-MS/MS analysis of PT modification in the SNJ1 virus. PT-modified d(G<sub>PS</sub>A) was detected in the SNJ1 virus after propagation in CJ7-F(pWHU3803) cells expressing *dndCDEA* from *H. jeotgali* A29. No PT modification was detected when the SNJ1 virus was propagated in CJ7-F cells in the presence of the empty plasmid pFJ6-H. Source data are provided as a Source Data file.

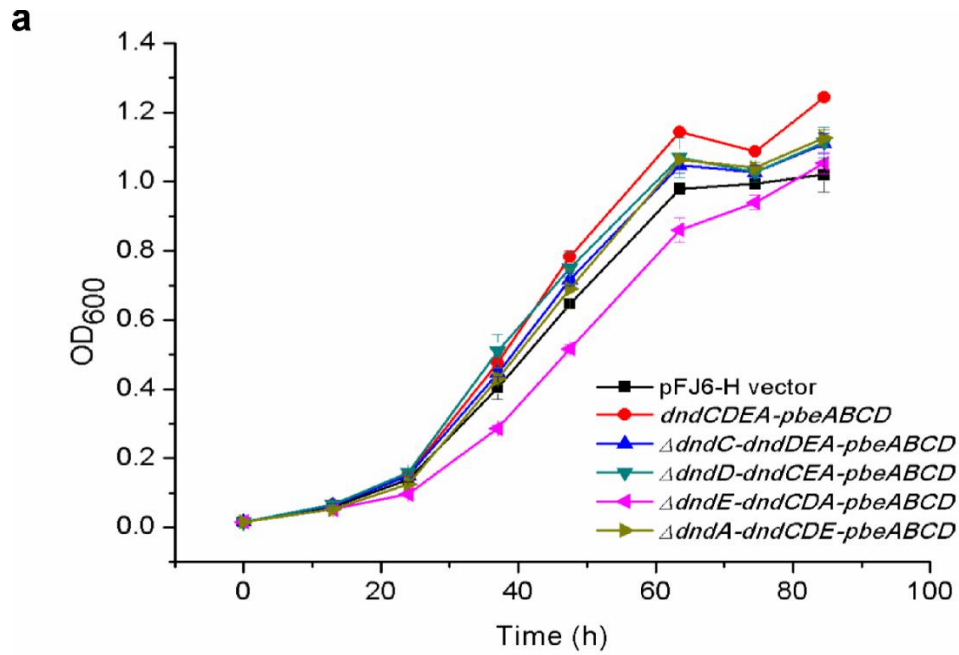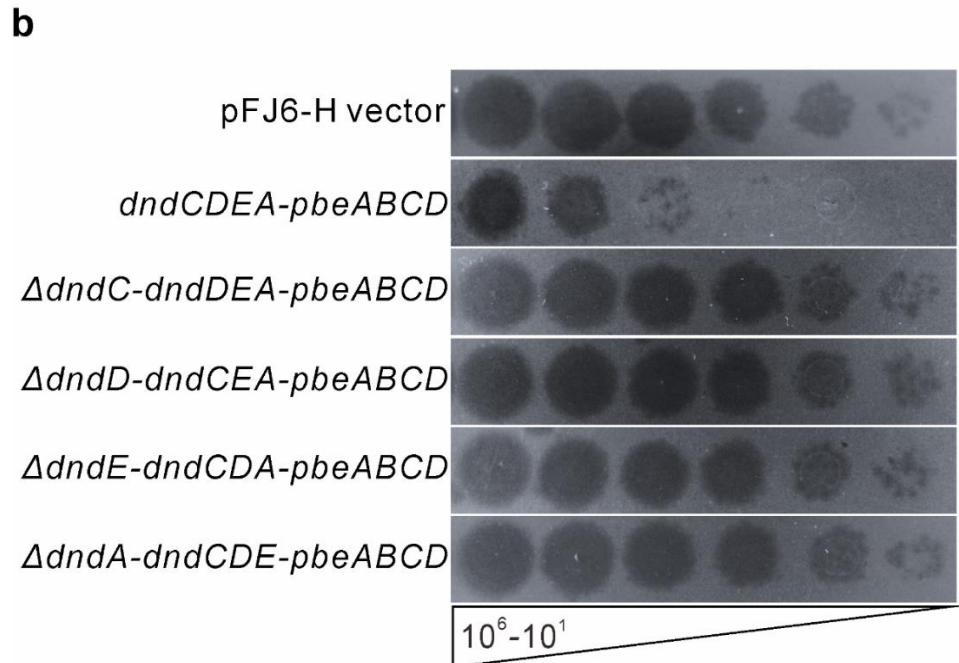

**Supplementary Figure 6.** Growth profiles and phage resistance of CJ7-F cells expressing DndCDEA-PbeABCD and variants. **a** CJ7-F cells carrying pWHU3809, pWHU3810, pWHU3811 or pWHU3812, expressing the inactivated *dndCDEA* genes but the complete *pbeABCD* cluster, displayed similar growth profiles to that of CJ7-F cells containing the empty vector pFJ6-H. **b** The individual deletion of each of the *dndCDEA* genes restored the sensitivity of CJ7-F cells to the SNJ1 virus. Source data are provided as a Source Data file.

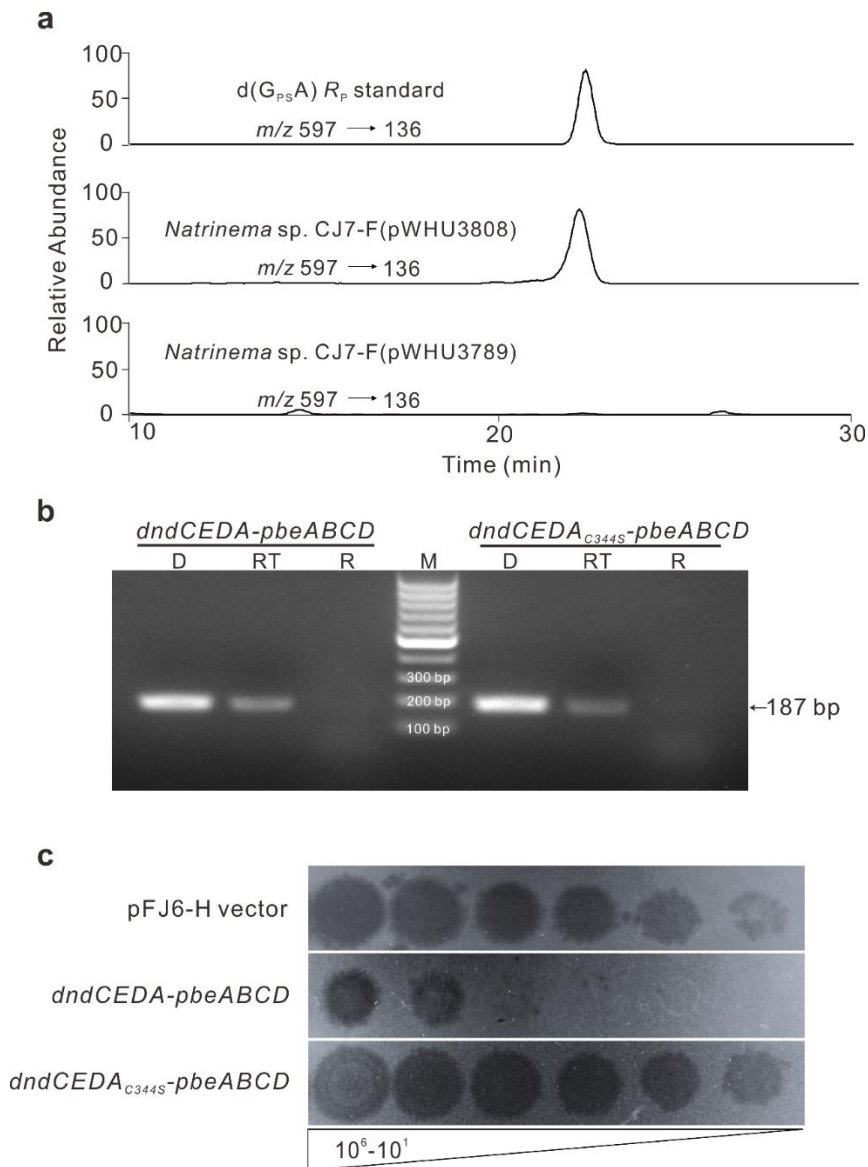

**Supplementary Figure 7.** The effects of a single point mutation in DndA on DNA PT modification, *pbe* module transcription and antiviral activity. **a** The single point mutation C344S in DndA in pWHU3789 resulted in the loss of the DNA PT modification in d(G<sub>ps</sub>A). This mutation had no effect on the transcription of the *pbe* operon (**b**) but caused failure to reduce the ability of the SNJ1 virus to form plaques (**c**). PCR products were obtained using genomic DNA (lanes marked with “D”), reverse-transcribed cDNA (lanes marked with “RT”) and untranscribed RNA (lanes marked with “R”) from CJ7-F(pWHU3808) and CJ7-F(pWHU3789) as templates, respectively. Primers *pbeC-D-F* and *pbeC-D-R* were listed in Supplementary Table 4. Source data are provided as a Source Data file.

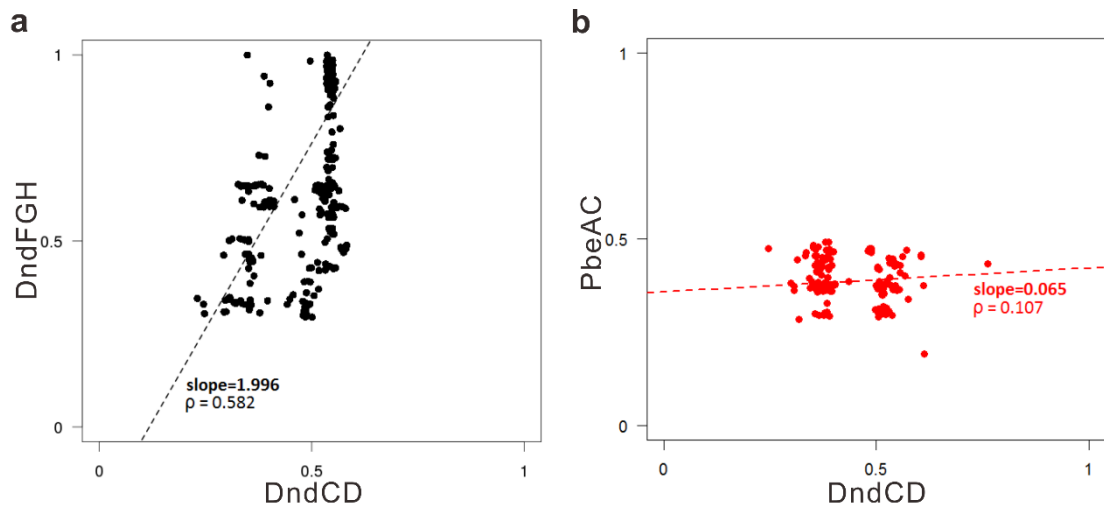

**Supplementary Figure 8.** Co-evolutionary comparison of the DndCD-PbeAC and DndCD-DndFGH systems. For strains harbouring both *pbeAC* and *dndCD*, we aligned the PbeAC and DndCD protein sequences with those of *H. jeotgali* A29. The alignment similarity rates of the former were regressed on the alignment similarity rates of the latter. A similar procedure was applied to the strains with both *dndFGH* and *dndCD*. Since *H. jeotgali* A29 lacks *dndFGH*, alignments were made with the sequence data from *S. enterica* serovar Cerro 87. **a** The high correlation coefficient ( $\rho = 0.582$ ) suggests the co-evolution of the DndCD and DndFGH components, consistent with previous observations. **b** In contrast, the low correlation coefficient ( $\rho = 0.107$ ) indicates a separate evolutionary process for DndCD and PbeAC.

## References

1. Zhang, Z. et al. Temperate membrane-containing halophilic archaeal virus SNJ1 has a circular dsDNA genome identical to that of plasmid pHH205. *Virology* **434**, 233-241 (2012).
2. Wang, Y., Chen, B., Sima, L., Cao, M. & Chen, X.J.A. Construction of expression shuttle vectors for the Haloarchaeon *natrinema* sp. J7 based on its chromosomal origins of replication. *Archaea* **2017**(2017).
3. Song, H.S. et al. *Halapricum salinum* gen. nov., sp. nov., an extremely halophilic archaeon isolated from non-purified solar salt. *Antonie van Leeuwenhoek* **105**, 979-986 (2014).
4. Cui, H. et al. *Halobellus limi* sp nov and *Halobellus salinus* sp nov., isolated from two marine solar salterns. *International Journal of Systematic and Evolutionary Microbiology* **62**, 1307-1313 (2012).
5. Cha, I.-T. et al. Genome sequence of the haloarchaeon *Haloterrigena jeotgali* type strain A29T isolated from salt-fermented food. *Standards in Genomic Sciences* **10**, 49 (2015).
6. Xu, Y., Zhou, P. & Tian, X. Characterization of two novel haloalkaliphilic archaea *Natronorubrum bangense* gen. nov., sp. nov. and *Natronorubrum tibetense* gen. nov., sp. nov. *International Journal of Systematic and Evolutionary Microbiology* **49**, 261-266 (1999).
7. Wang, Y. et al. Identification, characterization, and application of the replicon region of the halophilic temperate sphaerolipovirus SNJ1. *Journal of bacteriology* **198**, 1952-1964 (2016).
